# Supplementary material for: Highly efficient genome editing of human hematopoietic stem cells via a nano-silicon-blade delivery approach
Source: Royal Society of Chemistry journal article supplement (doi:10.1039/c7ib00060j), 2017-01-01
Supplement: c7ib00060j2.pdf [file c7ib00060j2.pdf]

**Figure. S1** (A) Side and top view of deformation delivery chip. (Scale bar: 5 mm) (B) Representative SEM images of the NB-Chip deformation zone. (C) Interaction force distributions in optimized design on silicon and previous design on DPMS are shown when cells membrane contact with constrictions on chip.

**Figure. S2** Representative flow cytometry results of the percentage of HSCs with FITC-labeled 70 kD dextran were calculated after cells treated with deformation chi

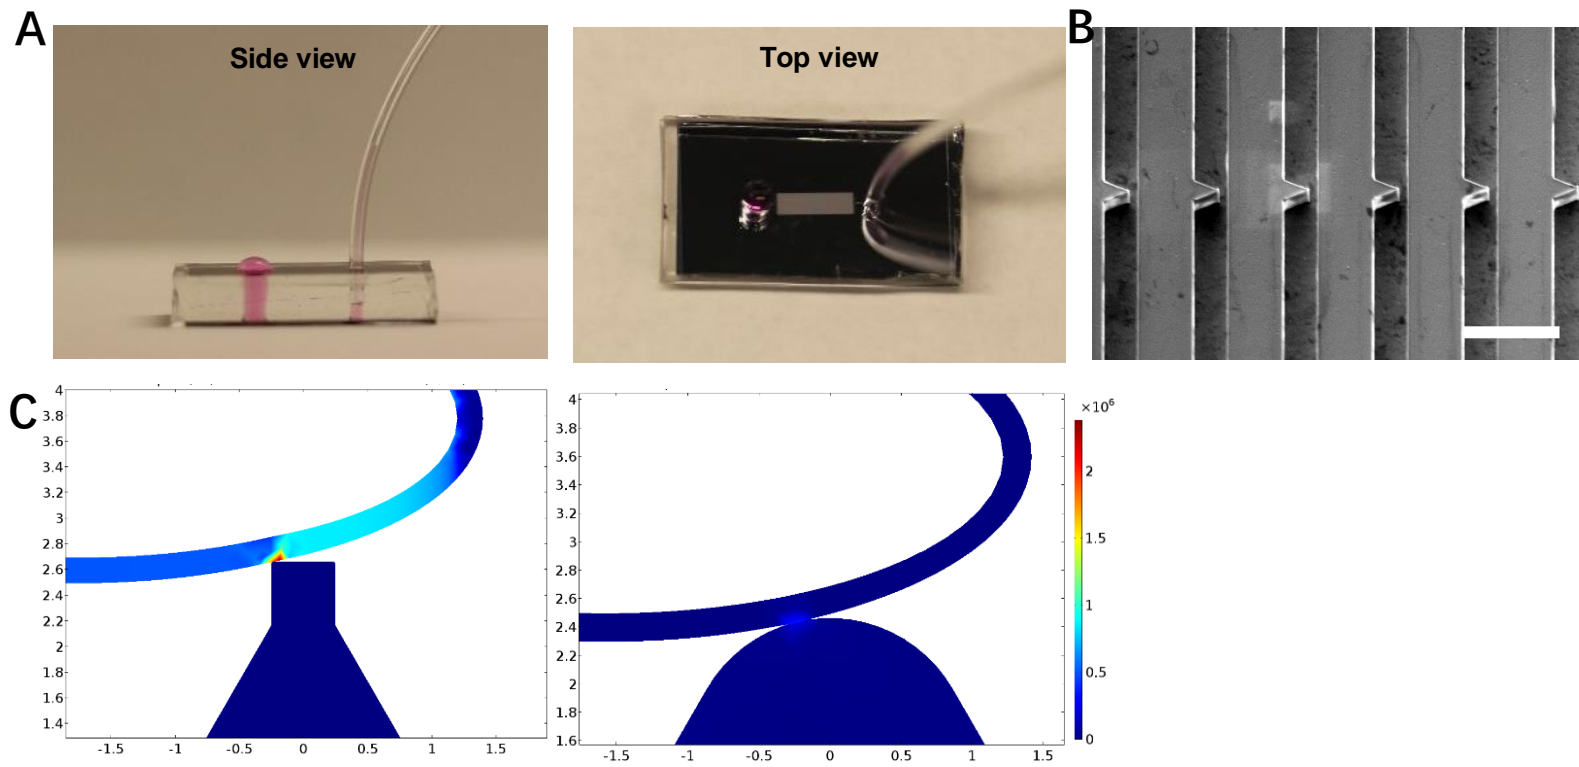

**Fig. S1**

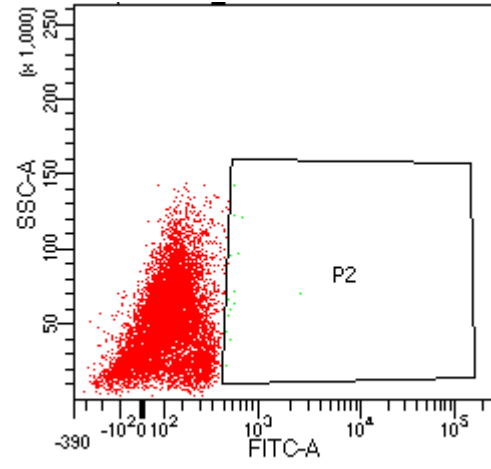

WT

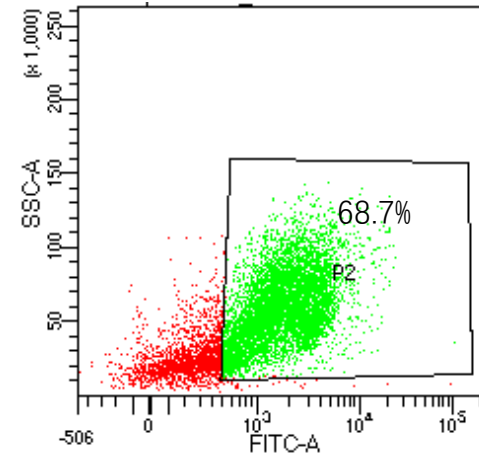

Delivery

Fig. S2
